# Supplementary material for: Combined Angiotensin Receptor–Neprilysin Inhibitors Improve Cardiac and Vascular Function Via Increased NO Bioavailability in Heart Failure
Source: PubMed Central journal article supplement — J Am Heart Assoc. 2018 Mar 3;7(5):e008268. doi: 10.1161/JAHA.117.008268 (PMC5866338; doi:10.1161/jaha.117.008268), 2018-03-03

# **SUPPLEMENTAL MATERIAL**

# Supplemental Figure 1

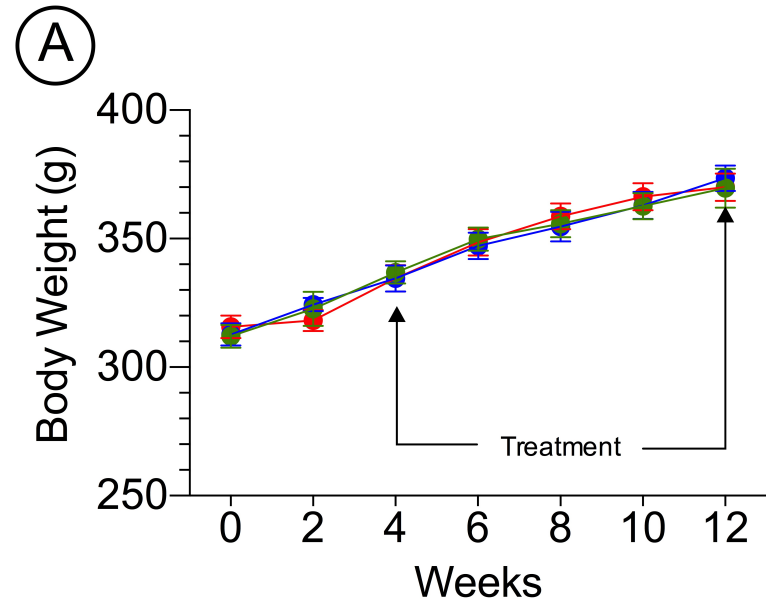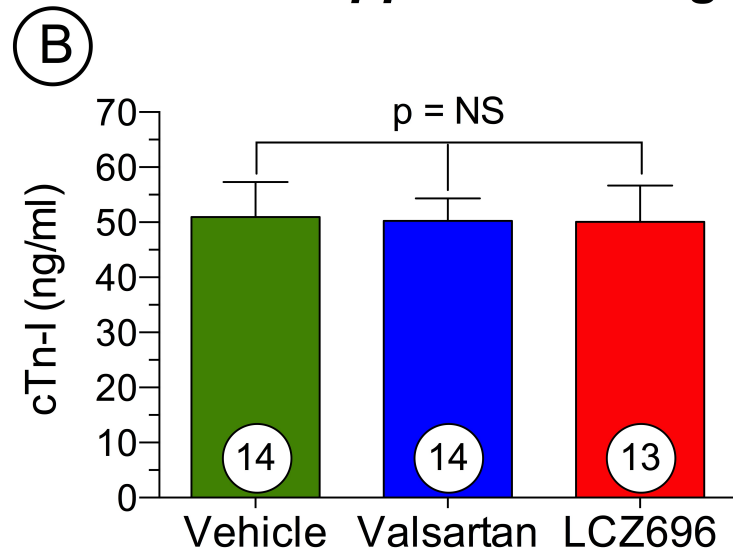

# Supplemental Figure 2

## 8 Weeks

## 12 Weeks

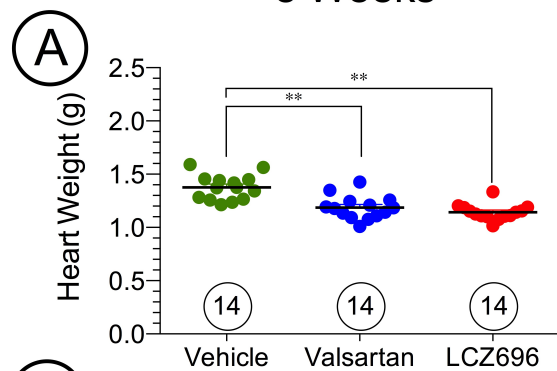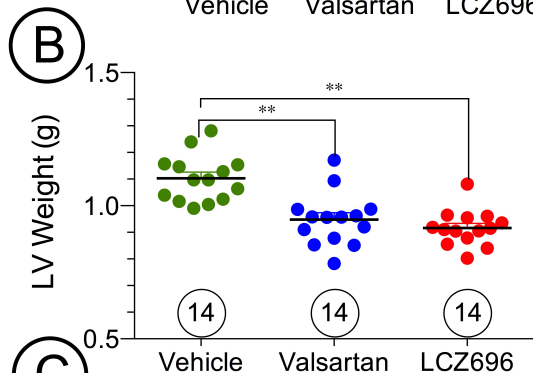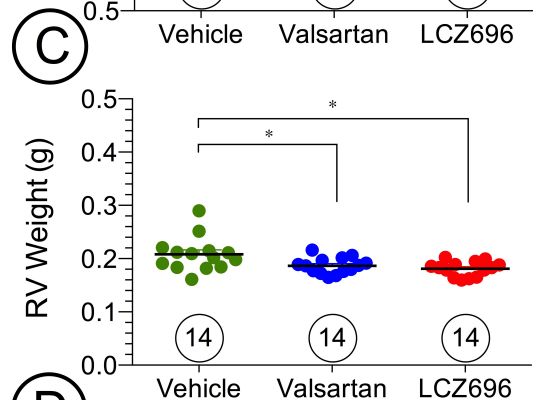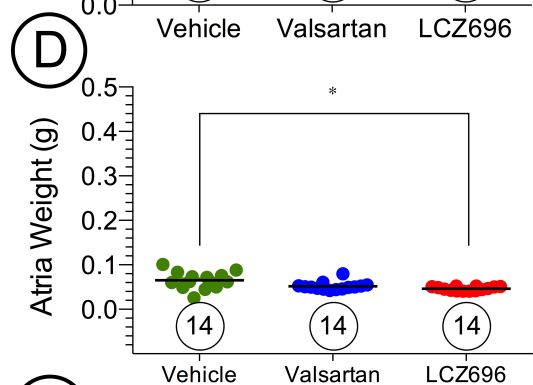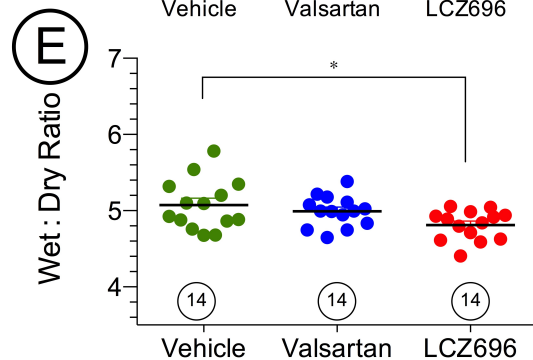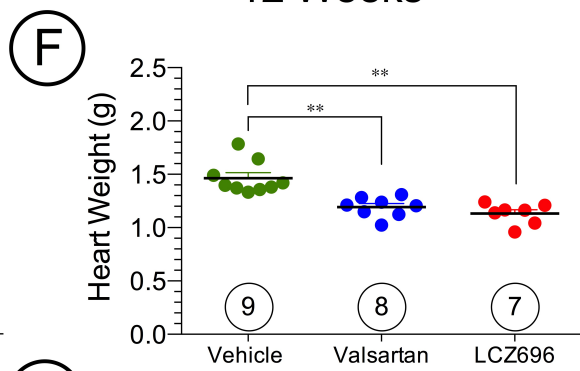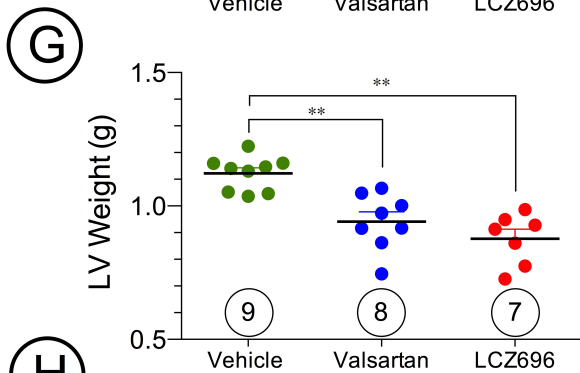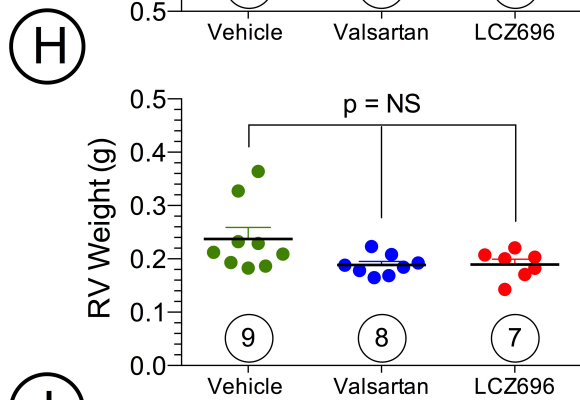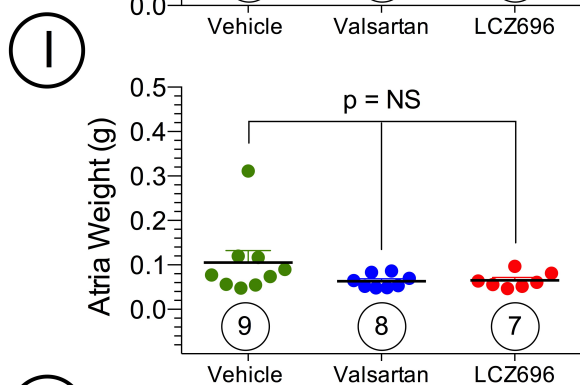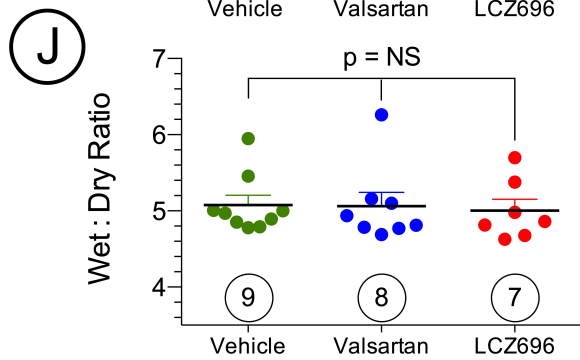

# Supplemental Figure 3

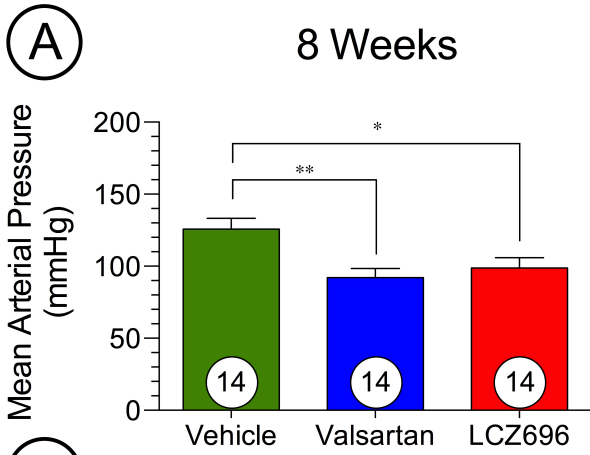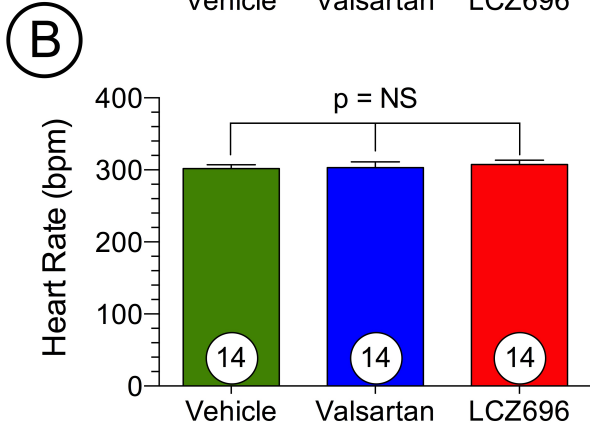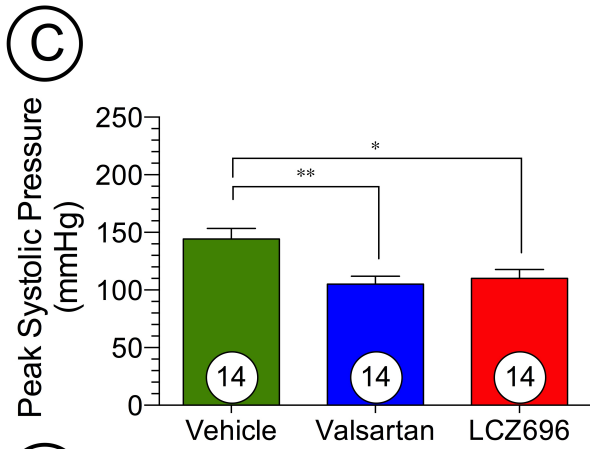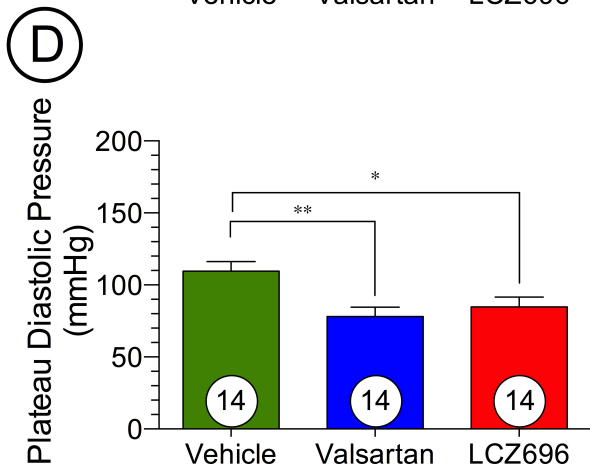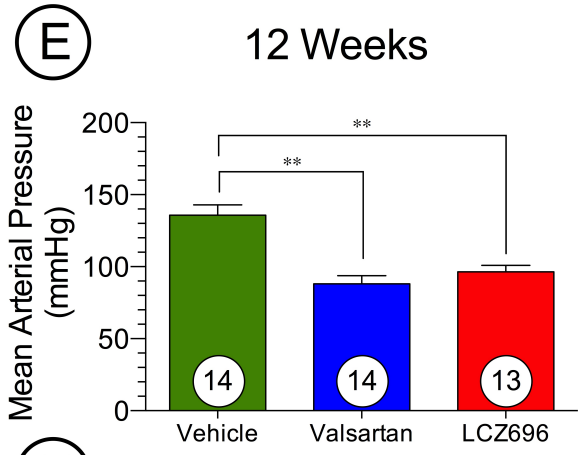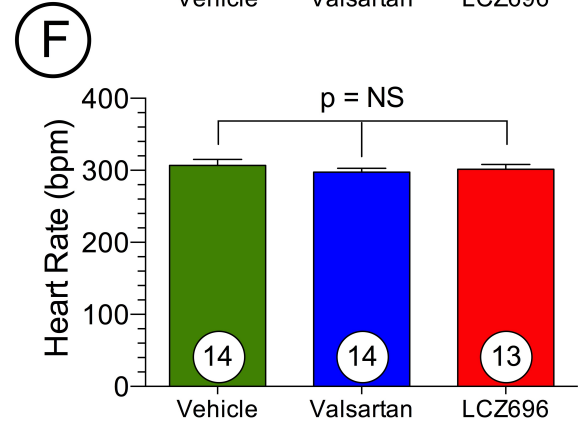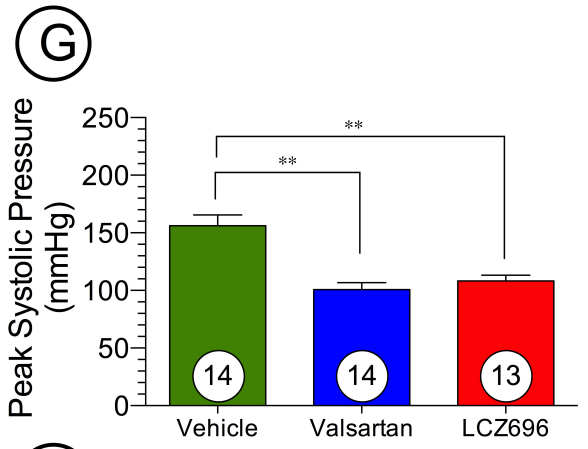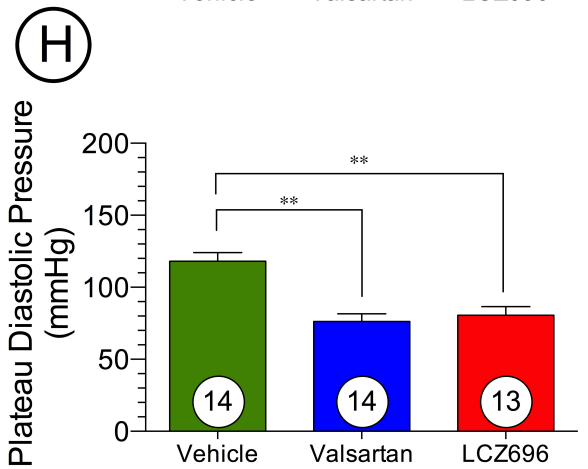

# Supplemental Figure 4

(A)

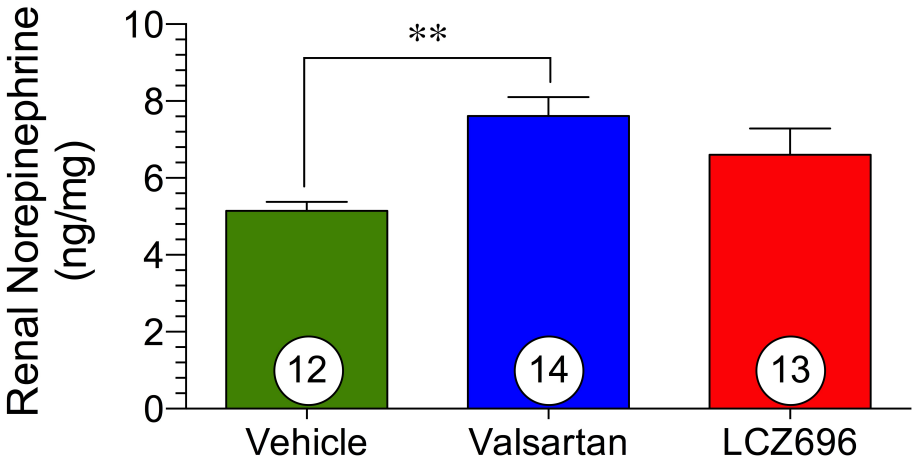

(B)

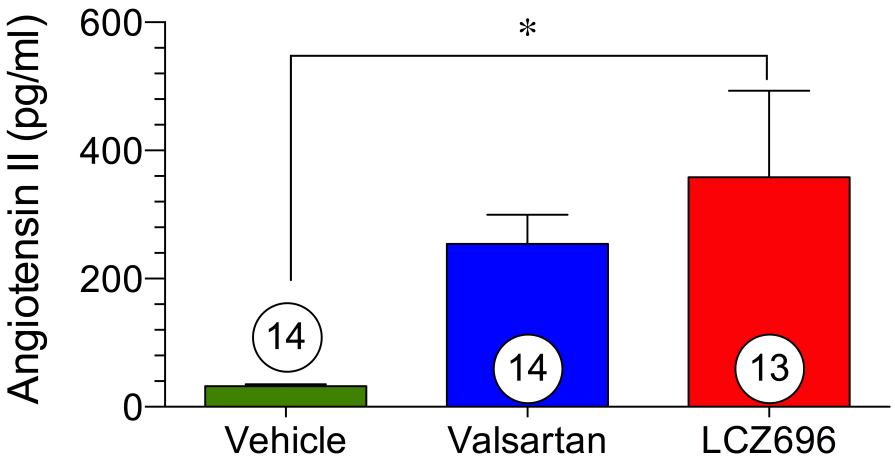

(C)

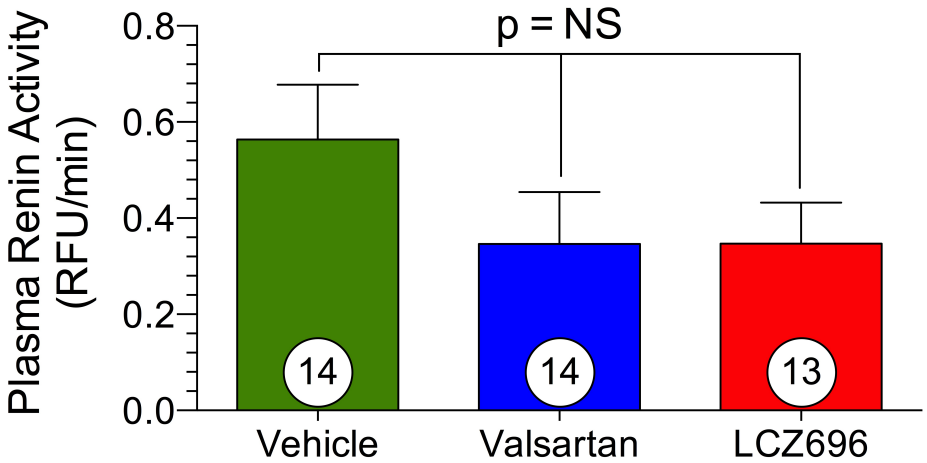

Supplement: JAH3-7-e008268-s001.pdf [file JAH3-7-e008268-s001.pdf]
